# Supplementary material for: Association of immune cell subsets with cardiac mechanics in the Multi-Ethnic Study of Atherosclerosis
Source: PubMed Central journal article supplement (PMC8410049; doi:10.1172/jci.insight.149193), 2021-07-08
Supplement: jciinsight-6-149193-s061.pdf [file jciinsight-6-149193-s061.pdf]

## Supplemental Materials

**Supplemental Table 1:** Flow Cytometry Antibody Isotypes and Fluorophores (Miltenyi Biotec).

| Assay                                                | Antigen               | Fluorophore    | Antibody    | Isotype     |
|------------------------------------------------------|-----------------------|----------------|-------------|-------------|
| <b>CD4 Subtypes</b>                                  | CD4                   | Per-CP-Vio     | 130-103-793 | 130-097-561 |
|                                                      | CD45RA                | APC-Vio        | 130-096-604 | 130-096-822 |
|                                                      | CD45RO                | VioBlue        | 130-099-044 | 130-094-671 |
|                                                      | CD28                  | PE             | 130-092-921 | 130-092-212 |
|                                                      | CD38                  | PE-Vio         | 130-099-151 | 130-096-638 |
|                                                      | CD57                  | APC            | 130-092-141 | 130-093-176 |
|                                                      | CD27                  | VioBright FITC | 130-104-845 | 130-104-513 |
| <b>CD8 Subtypes</b>                                  | CD8                   | Per-CP-Vio     | 130-097-911 | 130-097-563 |
|                                                      | CD45RA                | APC-Vio        | 130-096-604 | 130-096-822 |
|                                                      | CD45RO                | VioBlue        | 130-099-044 | 130-094-671 |
|                                                      | CD28                  | PE             | 130-092-921 | 130-092-212 |
|                                                      | CD38                  | PE-Vio         | 130-099-151 | 130-096-638 |
|                                                      | CD57                  | APC            | 130-092-141 | 130-093-176 |
|                                                      | CD27                  | VioBright FITC | 130-104-845 | 130-104-513 |
| <b><math>\gamma\delta</math>T Cells<br/>NK Cells</b> | CD16                  | Per-CP-Vio     | 130-100-430 | 130-098-595 |
|                                                      | CD3                   | VioBlue        | 130-094-363 | 130-094-671 |
|                                                      | CD $\gamma\delta$ TCR | PE             | 130-096-869 | 130-092-212 |
|                                                      | CD56                  | PE-Vio         | 130-100-676 | 130-104-616 |
| <b>Monocyte<br/>Subtypes</b>                         | CD16                  | Per-CP-Vio     | 130-100-430 | 130-098-595 |
|                                                      | TIE-2                 | APC-Vio        | 130-101-607 | 130-104-618 |
|                                                      | CX3CR1                | PE             | 130-105-837 | 130-104-612 |
|                                                      | CD14                  | PE-Vio         | 130-096-628 | 130-096-638 |
|                                                      | HLA-DR                | APC            | 130-095-297 | 130-091-836 |
|                                                      | CD163                 | FITC           | 130-096-626 | 130-092-213 |
| <b>Regulatory T<br/>Cells</b>                        | CD127                 | PeVio          | 130-099-719 | 130-096-638 |
|                                                      | CD25                  | VioBright FITC | 130-104-274 | 130-104-575 |
|                                                      | CD4                   | APC            | 130-092-374 | 130-096-653 |
| <b>Th1/2/17 Cells</b>                                | CD4                   | APC            | 130-092-374 | 130-096-653 |
|                                                      | CD8                   | VioBright FITC | 130-104-519 | 130-104-512 |
|                                                      | IFN $\gamma$          | PE-Vio 770     | 130-096-752 | 130-113-202 |
|                                                      | IL4                   | PE             | 130-092-212 | 130-091-647 |
|                                                      | IL17                  | APC-Vio 770    | 130-096-656 | 130-096-653 |

**Supplemental Table 2. Summary of Immune Cell Subsets in Participants with Cardiac MRI from the MESA Case-Cohort Sample**

| <b>Immune Cell Phenotype</b>                                             | <b>Immune Cell Label</b>                 | <b>N</b> | <b>% (Mean <math>\pm</math> SD)</b> |
|--------------------------------------------------------------------------|------------------------------------------|----------|-------------------------------------|
| <b>Innate Immune Cells</b>                                               |                                          |          |                                     |
| NK                                                                       | Natural Killer Cells                     | 1087     | 4.9 $\pm$ 5.6                       |
| CD14 <sup>++</sup> CD16 <sup>-</sup>                                     | Classical Monocytes                      | 922      | 74.6 $\pm$ 10.3                     |
| CD14 <sup>-</sup> CD16 <sup>++</sup>                                     | Non-classical Monocytes                  | 922      | 7.3 $\pm$ 7.3                       |
| CD14 <sup>+</sup> CD16 <sup>+</sup>                                      | Intermediate Monocytes                   | 922      | 18.1 $\pm$ 7.1                      |
| CD3 <sup>+</sup> $\gamma\delta$ <sup>+</sup>                             | Gamma-delta ( $\gamma\delta$ ) T Cells   | 1087     | 6.7 $\pm$ 6.3                       |
| <b>CD4<sup>+</sup> Adaptive Immune Cells</b>                             |                                          |          |                                     |
| CD4 <sup>+</sup> IFN <sup>+</sup>                                        | Th1 CD4 <sup>+</sup> T Cells             | 770      | 15.0 $\pm$ 9.0                      |
| CD4 <sup>+</sup> IL4 <sup>+</sup>                                        | Th2 CD4 <sup>+</sup> T Cells             | 770      | 2.9 $\pm$ 1.8                       |
| CD4 <sup>+</sup> IL17 <sup>+</sup>                                       | Th17 CD4 <sup>+</sup> T Cells            | 770      | 2.1 $\pm$ 1.4                       |
| CD4 <sup>+</sup> CD38 <sup>+</sup>                                       | Activated CD4 <sup>+</sup> T Cells       | 1051     | 26.7 $\pm$ 12.2                     |
| CD4 <sup>+</sup> CD45RA <sup>+</sup>                                     | CD4 <sup>+</sup> Naïve T Cells           | 1051     | 26.4 $\pm$ 11.8                     |
| CD4 <sup>+</sup> CD28 <sup>-</sup>                                       | Immunosenescent CD4 <sup>+</sup> T Cells | 1051     | 13.6 $\pm$ 9.9                      |
| CD4 <sup>+</sup> CD45RO <sup>+</sup>                                     | CD4 <sup>+</sup> Memory T Cells          | 1051     | 51.5 $\pm$ 13.3                     |
| CD4 <sup>+</sup> CD25 <sup>+</sup> CD127 <sup>-</sup>                    | T Regulatory Cells                       | 1035     | 5.0 $\pm$ 2.2                       |
| CD4 <sup>+</sup> CD28 <sup>-</sup> CD57 <sup>+</sup> CD45RA <sup>+</sup> | TEMRA Cells                              | 1051     | 5.4 $\pm$ 5.1                       |
| <b>CD8<sup>+</sup> Adaptive Immune Cells</b>                             |                                          |          |                                     |
| CD8 <sup>+</sup> CD38 <sup>+</sup>                                       | Activated CD8 <sup>+</sup> T Cells       | 1062     | 23.7 $\pm$ 12.2                     |
| CD8 <sup>+</sup> CD45RA <sup>+</sup>                                     | CD8 <sup>+</sup> Naïve T Cells           | 1062     | 52.3 $\pm$ 14.3                     |
| CD8 <sup>+</sup> CD28 <sup>-</sup>                                       | Immunosenescent CD8 <sup>+</sup> T Cells | 1062     | 55.1 $\pm$ 15.9                     |
| CD8 <sup>+</sup> CD45RO <sup>+</sup>                                     | CD8 <sup>+</sup> Memory T Cells          | 1062     | 21.9 $\pm$ 10.3                     |
| CD8 <sup>+</sup> CD28 <sup>-</sup> CD57 <sup>+</sup> CD45RA <sup>+</sup> | TEMRA Cells                              | 1062     | 32.3 $\pm$ 14.0                     |

CD4 subsets are displayed as % overall CD4<sup>+</sup> T cells, CD8 subsets are displayed as % overall CD8<sup>+</sup> T cells, Monocyte subsets are displayed as % overall CD14<sup>+</sup> monocytes,  $\gamma\delta$  T cells are displayed as % overall CD3<sup>+</sup> T cells, NK cells are displayed as % gated lymphocytes.

SD: standard deviation

TEMRA: Terminally differentiated effector memory

**Supplemental Table 3. Interaction of Sex with Immune Cell Subsets on Association with Global Circumferential Strain**

| <b>Immune Cell Subset</b>              | <b>Estimate (SE)</b> | <b>p-value</b> |
|----------------------------------------|----------------------|----------------|
| Classical Monocytes                    | <b>0.09 (0.02)</b>   | <b>0.0001</b>  |
| Gamma-delta ( $\gamma\delta$ ) T Cells | 0.05 (0.06)          | 0.43           |

Analysis adjusted for age, sex, race/ethnicity, smoking status, body-mass index, diabetes status, systolic blood pressure, total cholesterol, high density lipoprotein (HDL) cholesterol, statin use, estimated glomerular filtration rate, and log-transformed cytomegalovirus serostatus.

SE: standard error

**Supplemental Table 4. Interaction of Hypertension with Immune Cell Subsets on Association with Global Circumferential Strain**

| <b>Immune Cell Subset</b>              | <b>Estimate (SE)</b> | <b>p-value</b> |
|----------------------------------------|----------------------|----------------|
| Classical Monocytes                    | <b>0.07 (0.02)</b>   | <b>0.0001</b>  |
| Gamma-delta ( $\gamma\delta$ ) T Cells | <b>0.16 (0.07)</b>   | <b>0.02</b>    |

Analysis adjusted for age, sex, race/ethnicity, smoking status, body-mass index, diabetes status, systolic blood pressure, total cholesterol, high density lipoprotein (HDL) cholesterol, statin use, estimated glomerular filtration rate, and log-transformed cytomegalovirus serostatus.

SE: standard error

**Supplemental Figure 1. Gating Strategy for Regulatory T cells.**

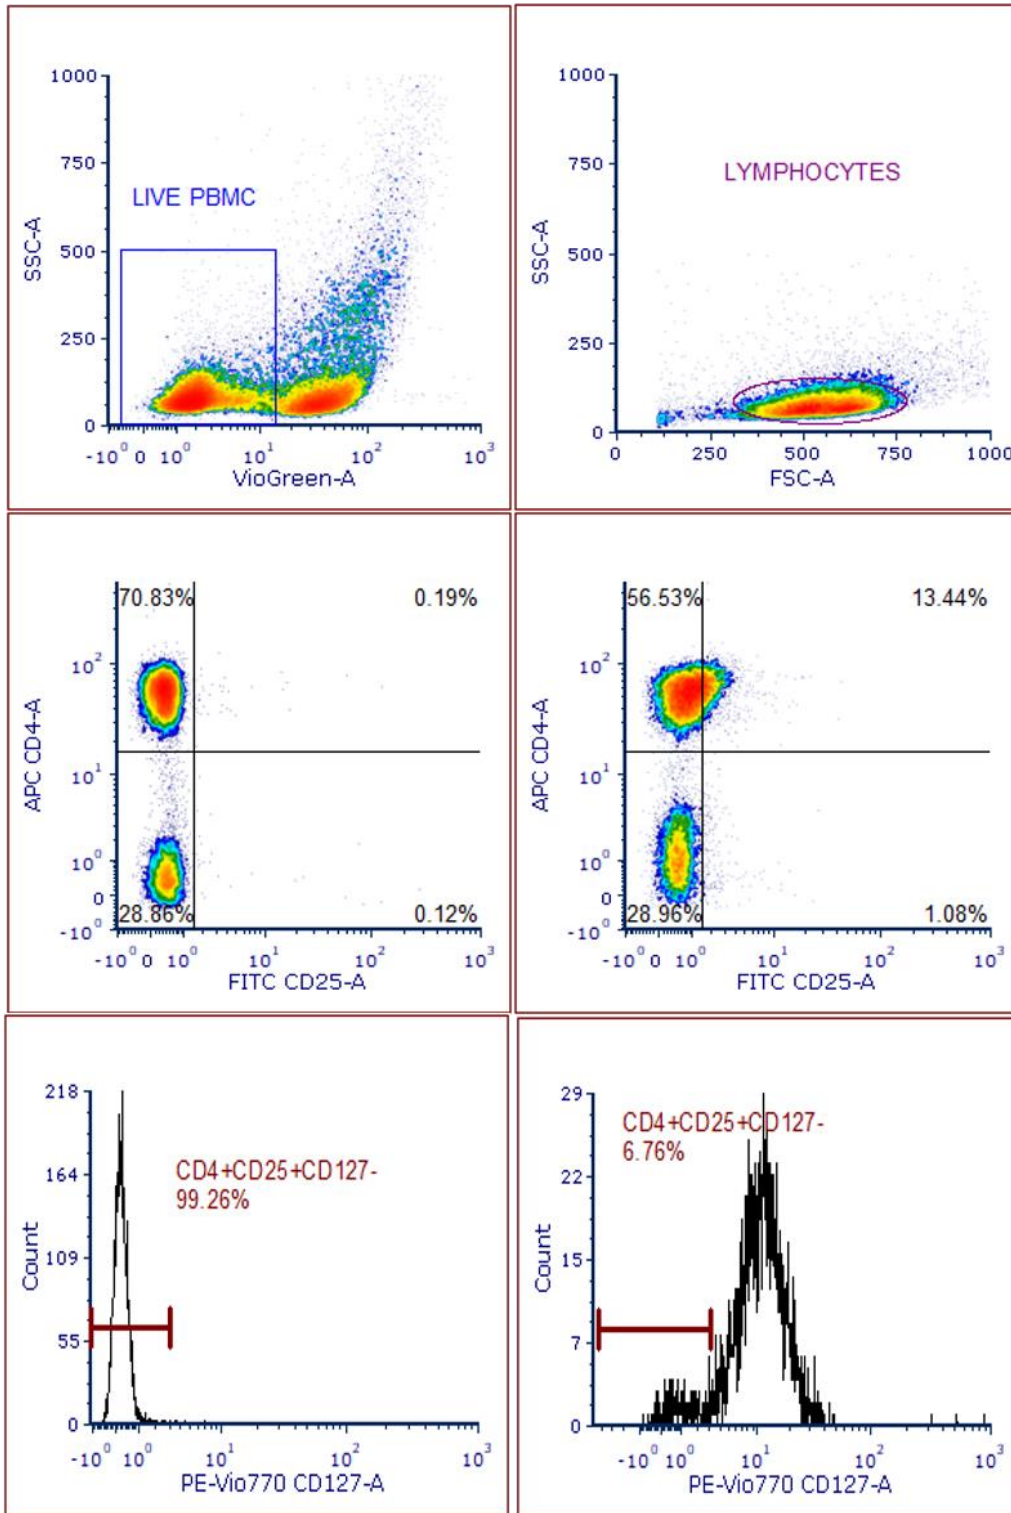

PBMCs were gated on live cells, then gated on lymphocytes, based on size and shape. Isotype controls were used to set negative gates using a CD4+ FMO tube. Histograms (Row 3) were gated on the CD4+CD25+ gate. Regulatory T cells are CD4+CD25+CD127-. Experiment conducted on 1035 samples. Original source: Feinstein MJ et al, ATVB 2021.

**Supplemental Figure 2.** Gating Strategy for  $\gamma\delta$  T cells and Natural Killer cells.

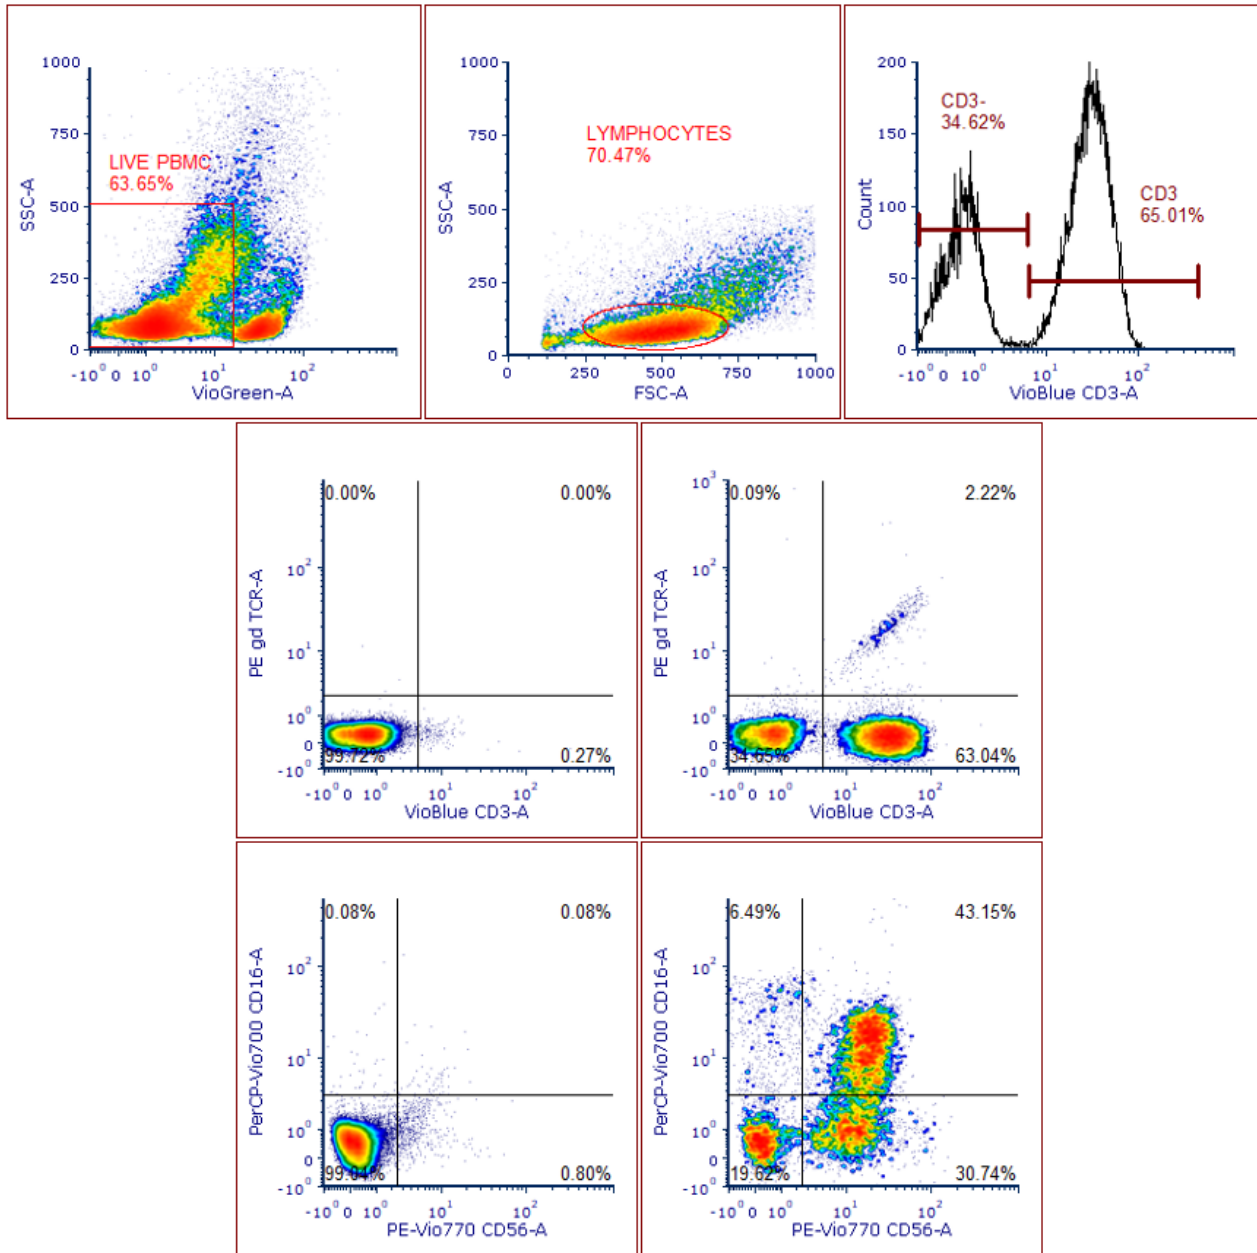

PBMCs were gated on live cells, then on lymphocytes based on size and shape. Isotype controls were used to set negative gates (2<sup>nd</sup> row, plot 1 and 3<sup>rd</sup> row plot 1). The lymphocyte gate was used to determine CD3<sup>+</sup>, CD3<sup>-</sup>, and  $\gamma\delta$  T cells (expressed as %CD3). NK cells were gated on the CD3<sup>-</sup> gate. Experiment conducted on 1087 samples. Original source: Feinstein MJ et al, ATVB 2021.

**Supplemental Figure 3. Gating Strategy for CD4 and CD8 T Cell Subsets.**

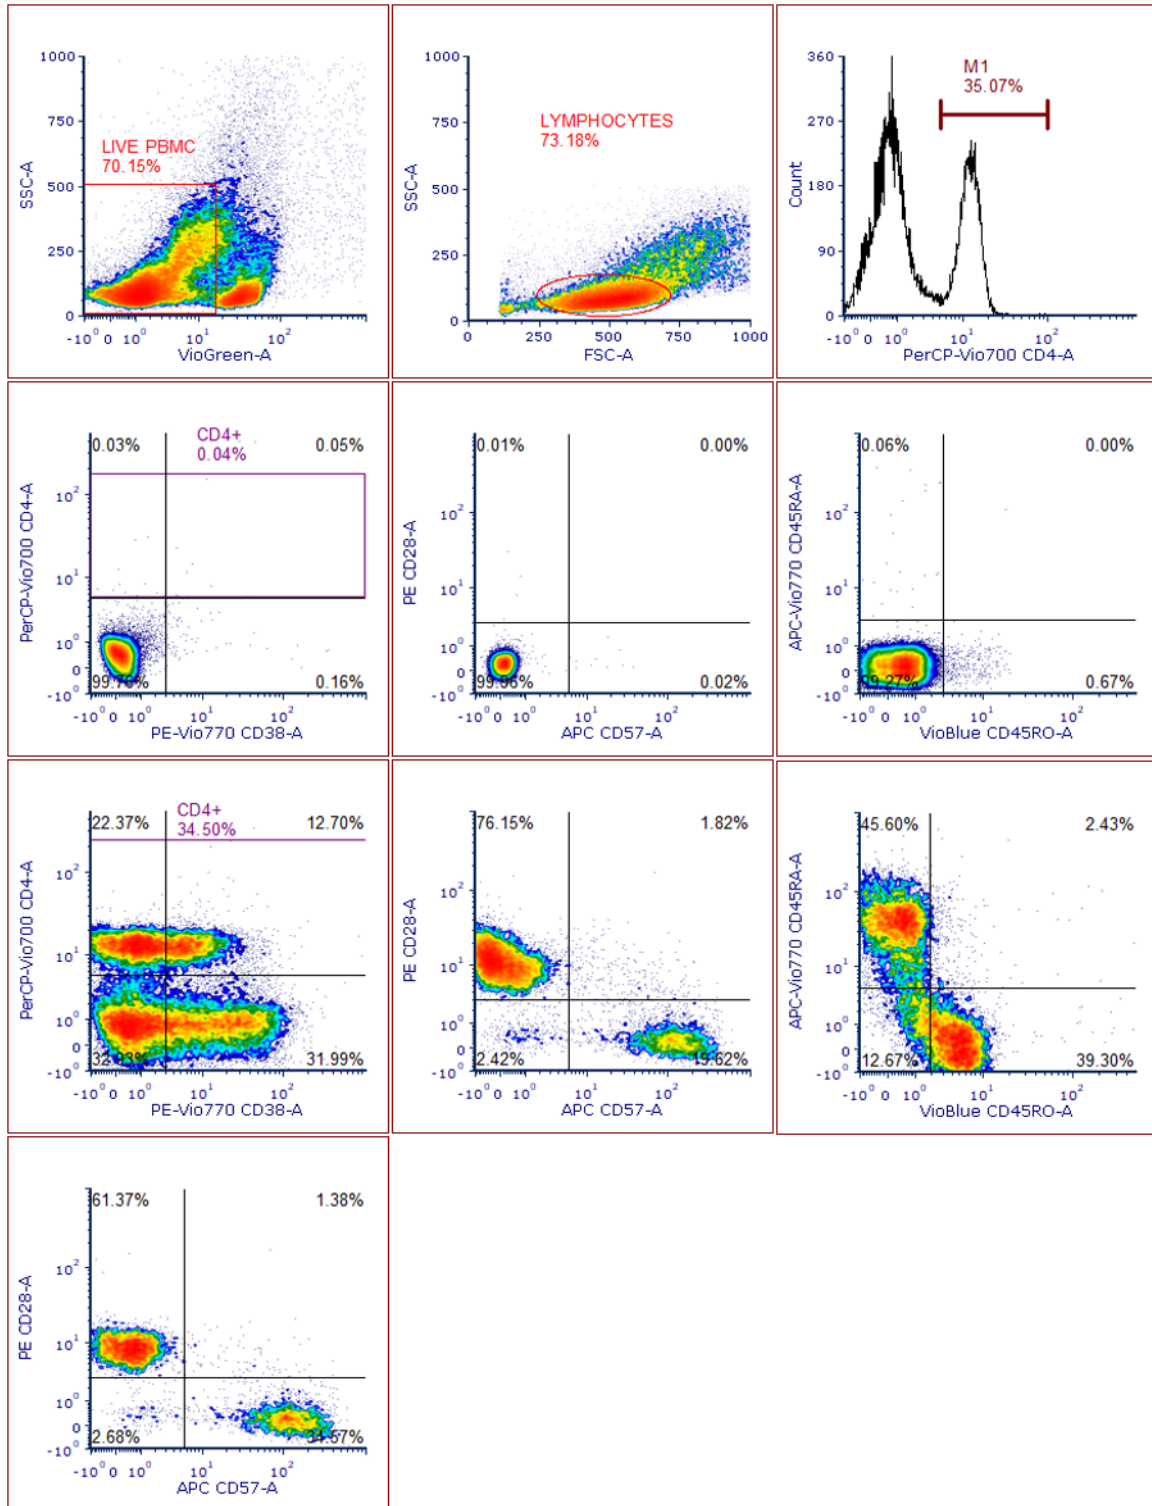

PBMCs were gated on live cells, then on lymphocytes based on size and shape. Isotype controls were used for negative gate setting (Row 2) and the test sample (3<sup>rd</sup> row). The 4<sup>th</sup> row was gated on the CD4+CD45RA+ gate to yield the CD4+ T<sub>EMRA</sub> cells (CD4+CD45RA+CD28-CD57+). The CD8 samples were done identically except CD8 was substituted for CD4. Experiment conducted on 1051 and 1062 samples for CD4 and CD8 immune cell subsets, respectively. Original source: Feinstein MJ et al, ATVB 2021.

**Supplemental Figure 4. Gating Strategy for Th1/2/17 Cell Subsets.**

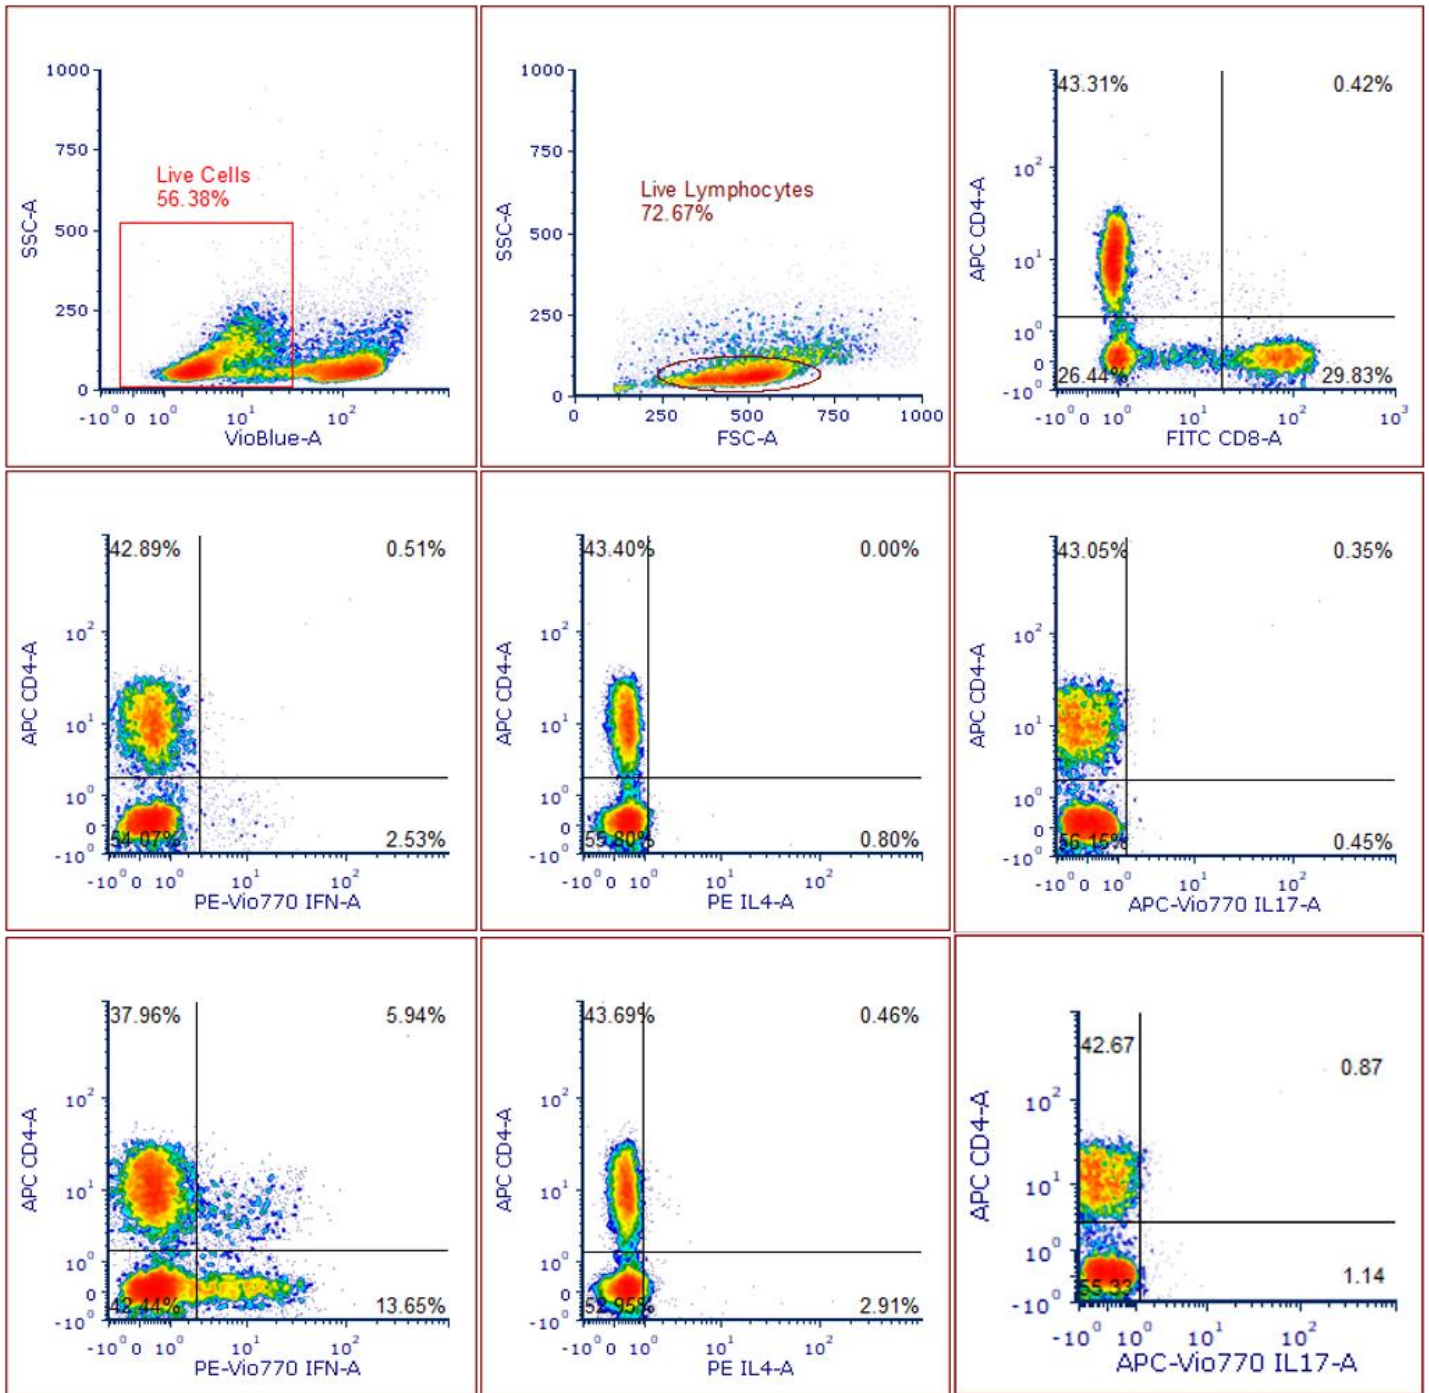

PBMCs were gated on live cells, then on lymphocytes based on size and shape (top row). Using a modified FMO approach (middle row), a CD4/CD8 tube with appropriate isotypes was used to set negative gates for IFN $\gamma$ , IL4 and IL17. Finally, the test sample allows for the quantitation of IFN $\gamma$ , IL4 and IL17 produced by the cells. Experiment conducted on 770 samples. Original source: Feinstein MJ et al, ATVB 2021.



**Supplemental Figure 5.** Gating Strategy for Monocyte Subsets.

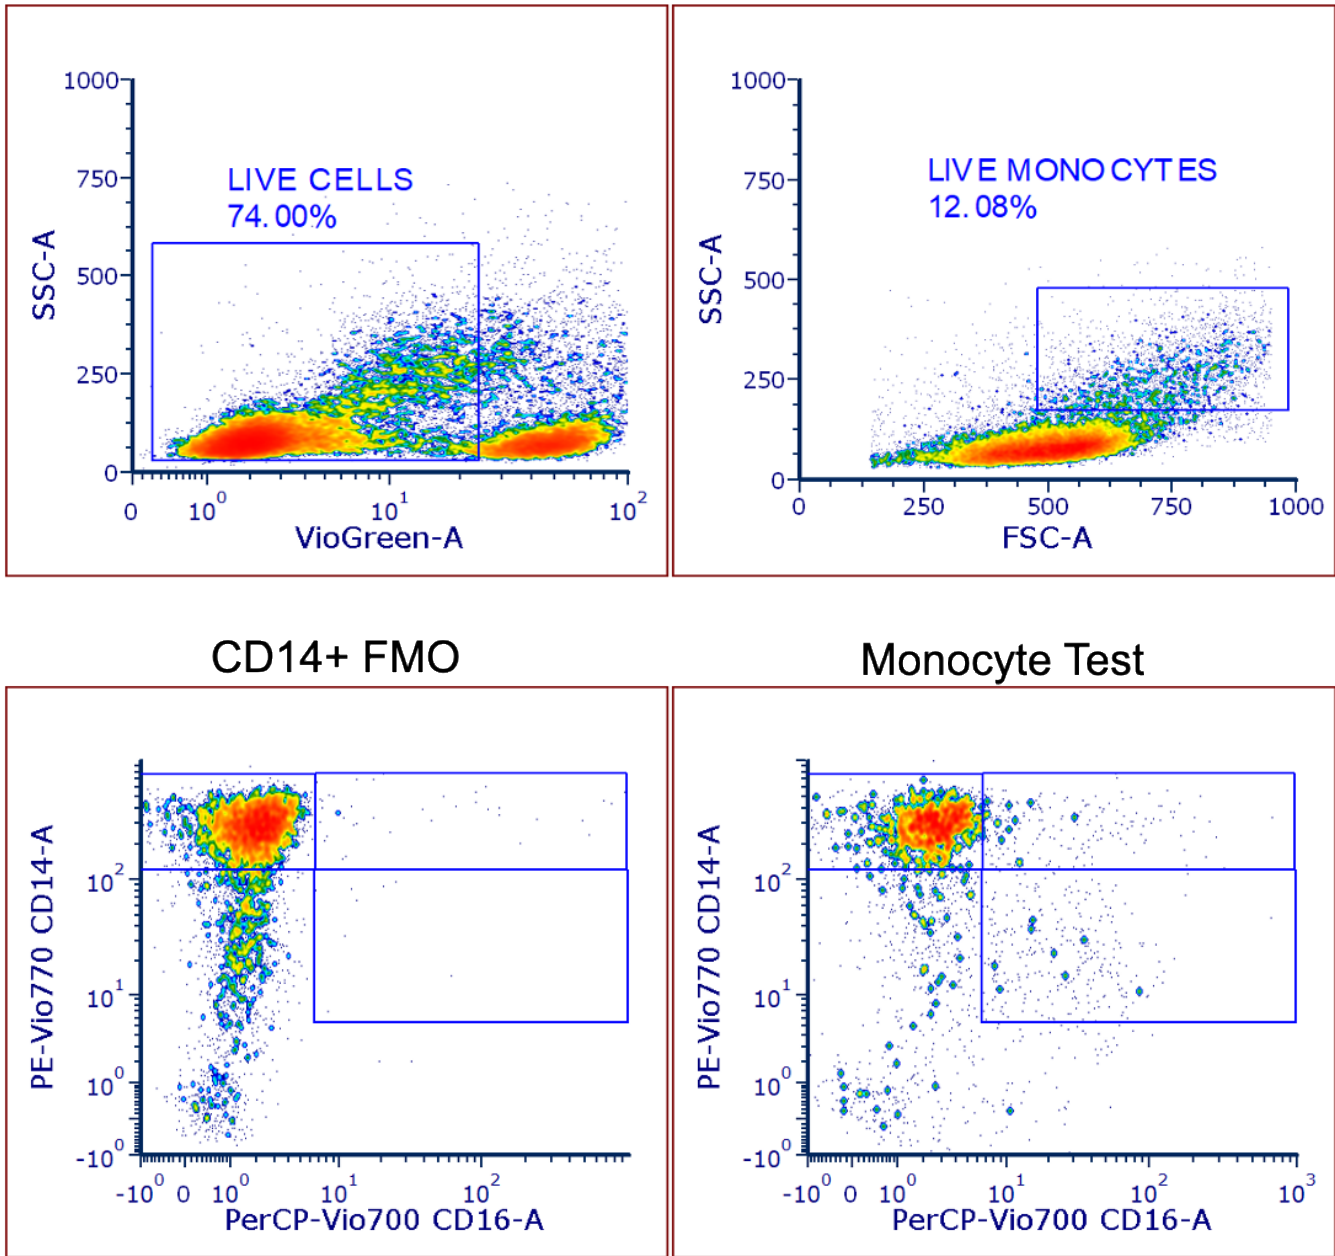

PBMCs were gated on live cells, then on monocytes based on size/shape. Using a CD14+ fluorescence minus one (FMO) approach, the negative CD16 gate was set. Finally, the CD16 Ab was added to the test sample to yield the CD14<sup>++</sup>CD16<sup>-</sup> gate, the CD14<sup>+</sup>CD16<sup>+</sup> gate and the CD14<sup>dim</sup>CD16<sup>+</sup> gate. These 3 gates are added to yield the CD14 total and the 3 gates are reported as percentage of this total CD14. Experiment conducted on 922 samples. Original source: Feinstein MJ et al, ATVB 2021.

**Supplemental Figure 6. Estimated Marginal Plots Evaluating the Interaction of Sex on the Association between Immune Cell Subsets and Global Circumferential Strain**

**6A**

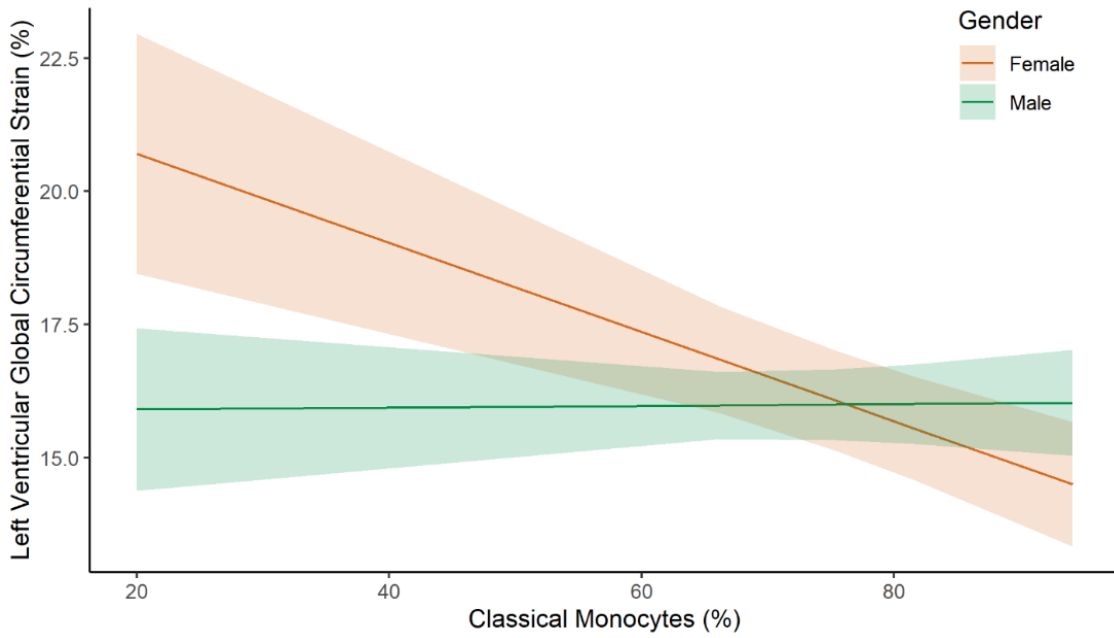

**6B**

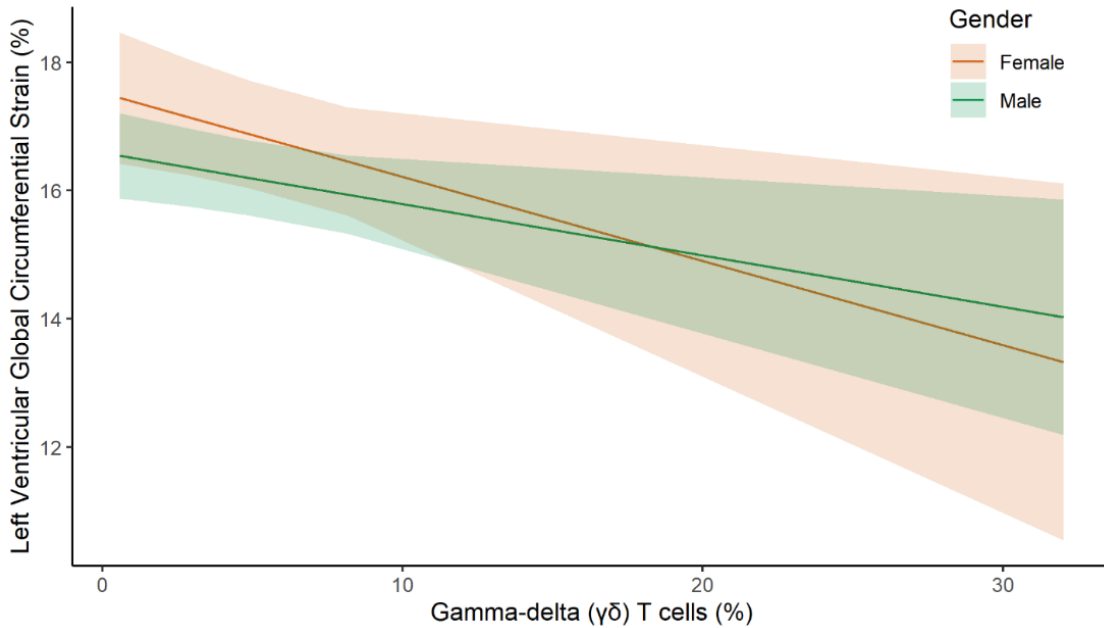

A. The association of classical monocytes with left ventricular global circumferential strain had a significant interaction with sex. There was a strong negative association between classical monocytes (%) and left ventricular global circumferential strain (%) in females and no significant association in males. B. The association of Gamma-delta ( $\gamma\delta$ ) T cells with left ventricular global circumferential strain had no significant interaction with sex.

**Supplemental Figure 7. Estimated Marginal Plots Evaluating the Interaction of Hypertension on the Association between Immune Cell Subsets and Global Circumferential Strain**

**7A.**

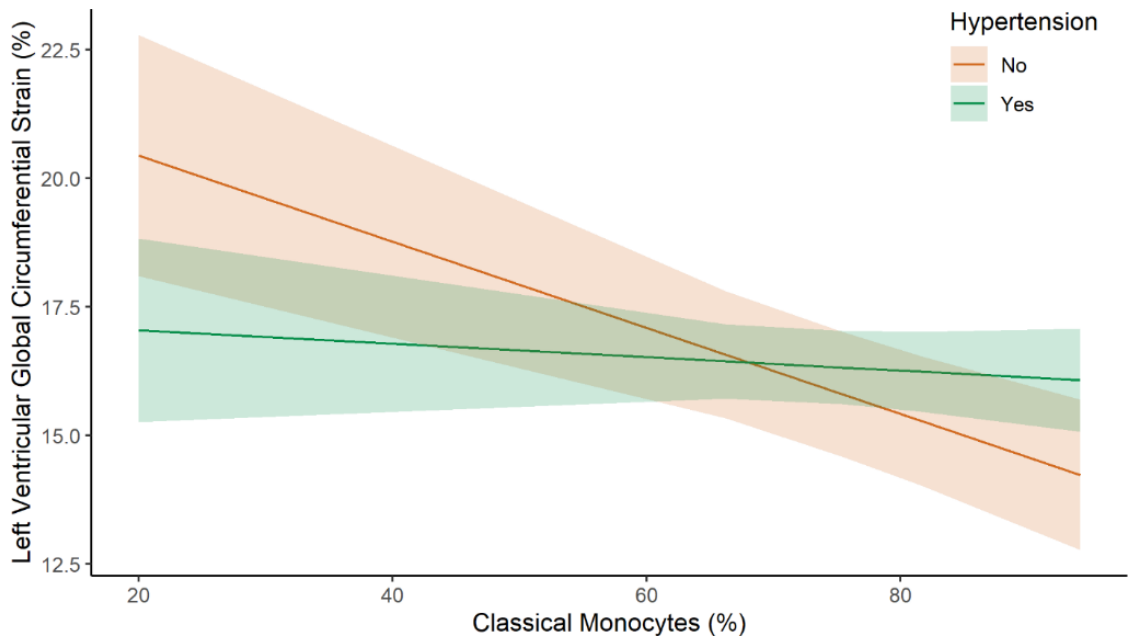

**7B.**

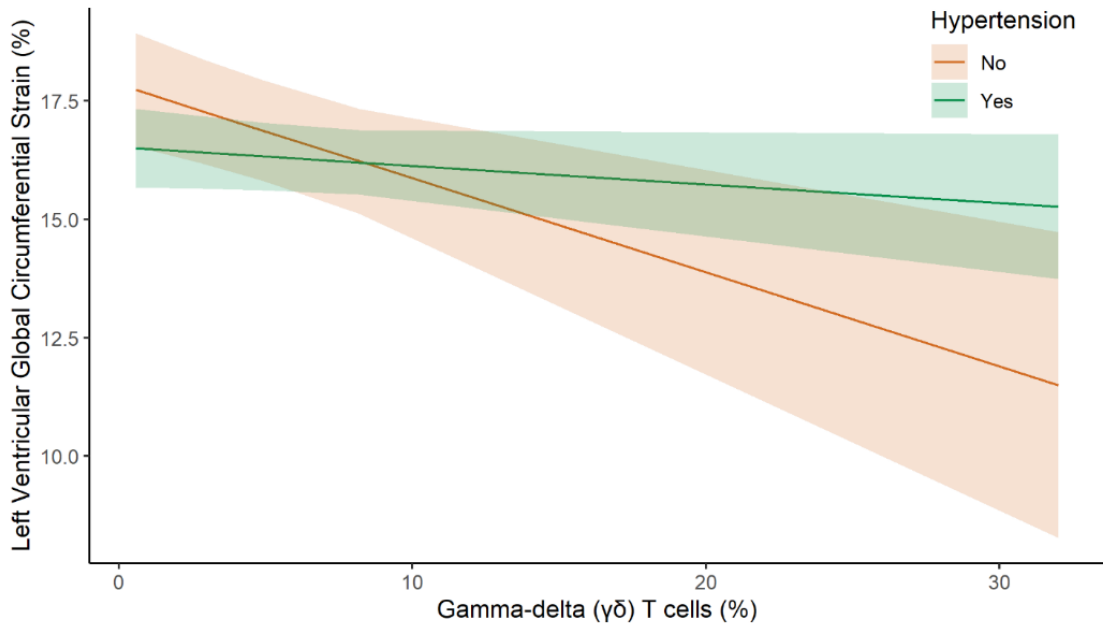

A. The association of classical monocytes with left ventricular global circumferential strain had a significant interaction with hypertension status. There was a significant association between classical monocytes (%) and left ventricular global circumferential strain (%) only in adults without hypertension. B. The association of Gamma-delta ( $\gamma\delta$ ) T cells with left ventricular global circumferential strain had a significant interaction with hypertension status. There was a significant association between Gamma-delta ( $\gamma\delta$ ) T cells (%) and left ventricular global circumferential strain (%) only in adults without hypertension.
